# Supplementary material for: Trade-Off Relation between Fungicide Sensitivity and Melanin Biosynthesis in Plant Pathogenic Fungi
Source: PubMed Central journal article supplement (PMC7582099; doi:10.1016/j.isci.2020.101660), 2020-10-08
Supplement: mmc1.pdf [file mmc1.pdf]

**iScience, Volume 23**

**Supplemental Information**

**Trade-Off Relation between Fungicide  
Sensitivity and Melanin Biosynthesis  
in Plant Pathogenic Fungi**

**Ken Harata, Hiroyuki Daimon, and Tetsuro Okuno**

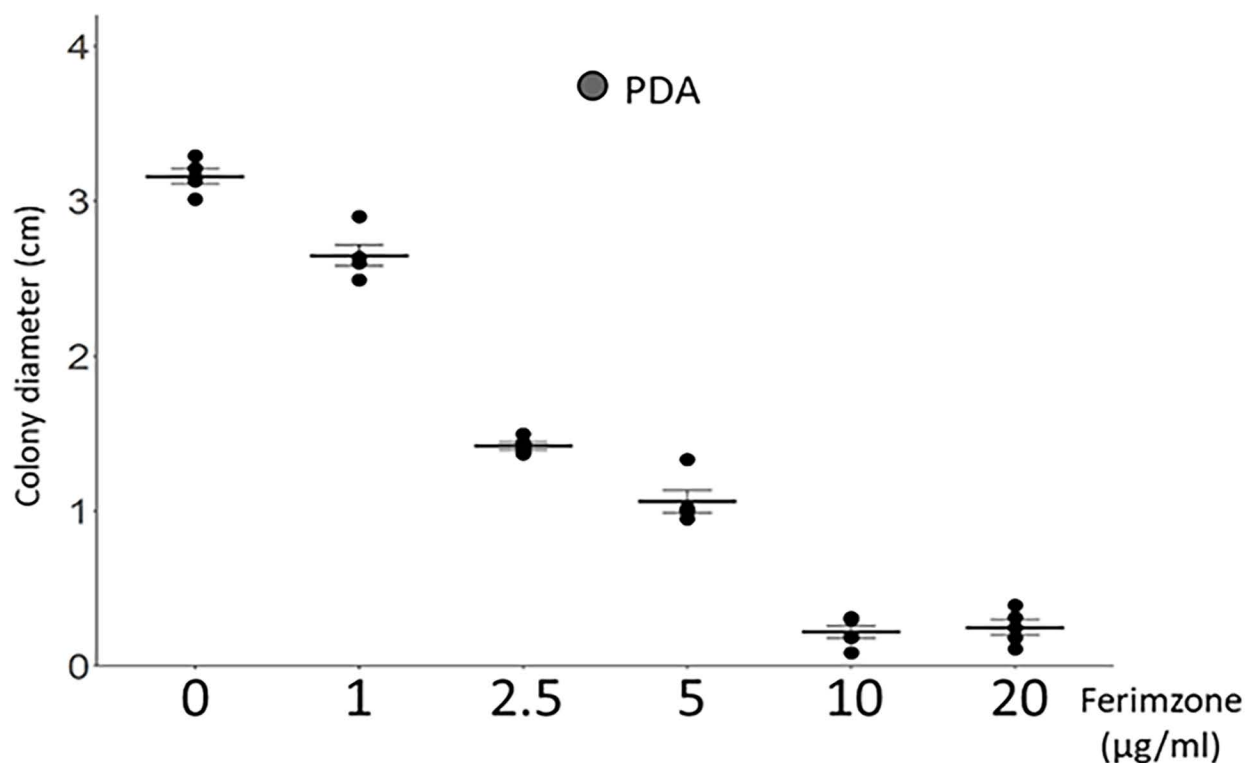

**Figure S1. Average Colony Diameter in the Wild-type on the PDA Medium Containing Different Concentrations of Ferimzone. Related to Figure 1 and 6**

Ferimzone-sensitivity tests of the wild-type. A mycelial block of the wild-type was placed on ferimzone-containing PDA medium and was incubated for 6 days at 24°C. Error bars represent standard deviation of the mean (n = 5). 0; PDA medium, 1; 1 µg/ml ferimzone-containing PDA medium, 2.5; 2.5 µg/ml ferimzone-containing PDA medium, 5; 5 µg/ml ferimzone-containing PDA medium, 10; 10 µg/ml ferimzone-containing PDA medium, 20; 20 µg/ml ferimzone-containing PDA medium.

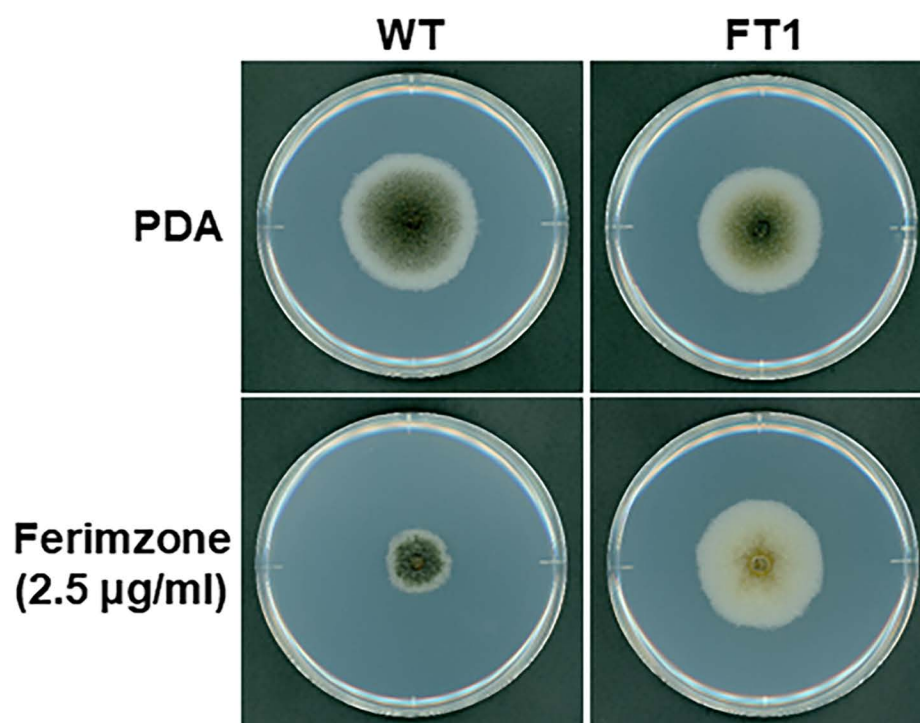

**Figure S2. The FT1 Transformant Shows a Low Sensitivity to Ferimzone. Related to Figure 1**

A ferimzone-tolerance assay of the FT1 transformant. A mycelial block of each strain was placed on PDA medium containing 2.5 µg/ml ferimzone and was incubated for 6 days at 24°C. WT, wild-type; FT1, the T-DNA insertion transformant with low ferimzone-sensitivity.

```

                *           20           *           40           *
CoIct1 : -MAEHTYKFNVSMSCGGCSGAVDRVLKRLDG-VKSYEVSLESCTATVVAE : 48
AfAtx1 : -MSEHQYKFNVSMSCGGCSGAVRVLKRLDG-VKSFDVNIDSCTAIVTTE : 48
ScAtx1 : MAEIKHYQFNVVMTCSGCSGAVNKVLTKLEPDVSKIDISLEKQ--LVDVY : 48
        m eh YkFNVsM3CgGCSGAV 4VLk4Ldg Vks d6sLesQtalV e

                60           *           80
CoIct1 : DSLFYEKVLCTIAKTGKRVNSGSADGVEQSV DVNDA : 84
AfAtx1 : ETVSYETVLIATIKKTGKTVNSGEADGKPM DV----- : 79
ScAtx1 : TTLPYDFILEKIKKTGKEVRS GKQL----- : 73
        36pYe 6L tIkKTGK VnSG adg v

```

**Figure S3. The Amino Acid Sequence of Colct1 Shows High Homology with Atx1 of *A. fumigatus* and *S. cerevisiae*. Related to Figure 1**

The amino acids of *C. orbiculare* Colct1 were aligned with those of *A. fumigatus* Atx1 and *S. cerevisiae* Atx1 using the Clustal W program. Numbers on the right indicate amino acid residue positions. Identical amino acids are indicated by a black background, similar residues are indicated by a gray background and gaps introduced for alignments are indicated by a hyphen using GeneDoc.

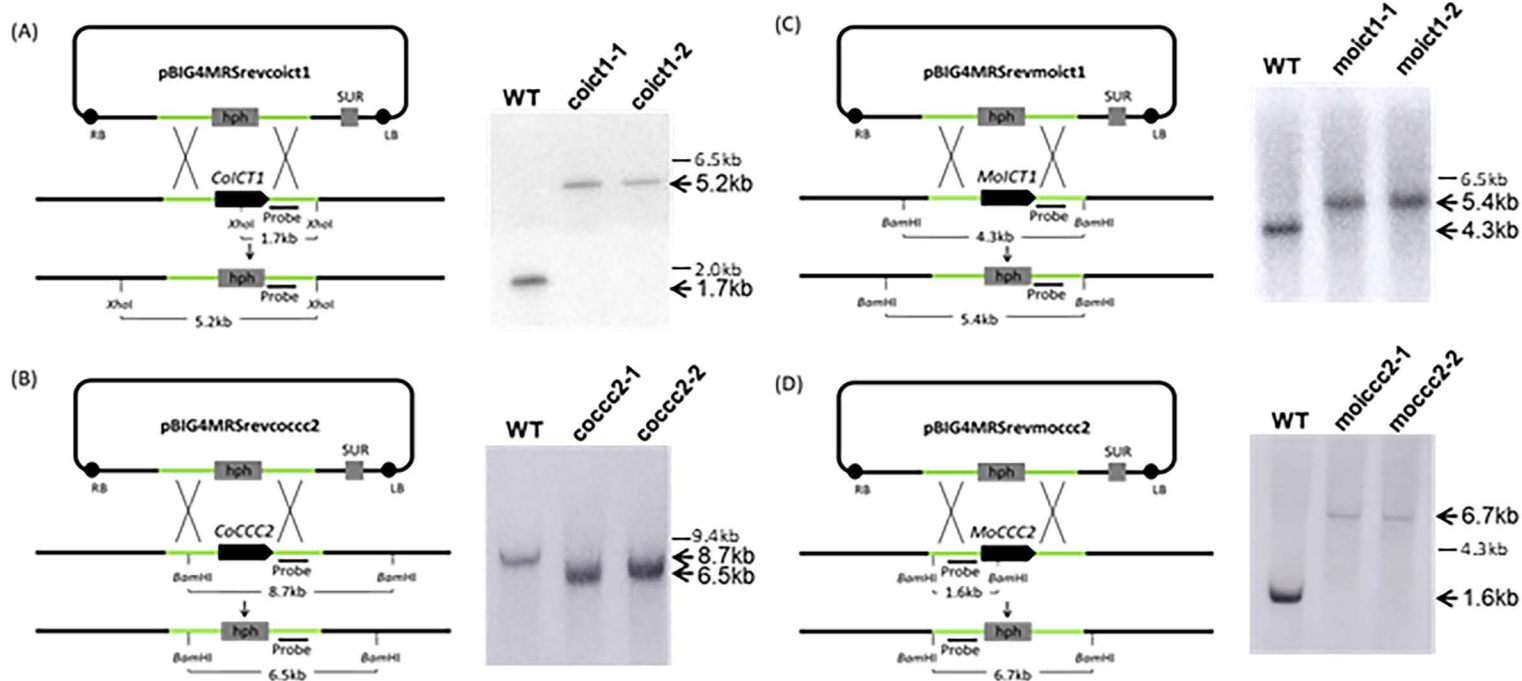

**Figure S4. Confirmation of Targeted Gene Disruptions by Southern Blotting Analyses. Related to Figure 1, 5 and 6**

(A) A schematic diagram of the *ColCT1* gene disruption construct in *C. orbiculare* by *Agrobacterium tumefaciens*-mediated transformation with the *coict1* disruption vector to replace a hygromycin phosphotransferase gene (*hph*) fragment with the *ColCT1* gene. Bars represent probes for DNA gel blot. Following double-crossover homologous recombination, an *XhoI* fragment of approximately 1.7 kb containing *ColCT1* in the wild-type is predicted to be replaced by a fragment of approximately 5.2 kb containing the *hph* fragment. *ColCT1* gene disruption was confirmed by Southern blot analysis. Genomic DNAs from the wild-type 104-T and transformants were digested with *XhoI* and the probe with an upstream 1.0 kb fragment of the *ColCT1* gene. (B) A schematic diagram of the *CoCCC2* gene disruption construct in *C. orbiculare* by *Agrobacterium tumefaciens*-mediated transformation with the *coccc2* disruption vector to replace the hygromycin phosphotransferase gene (*hph*) fragment with the *CoCCC2* gene. Bars represent probes for the DNA gel blot. Following double-crossover homologous recombination, a *BamHI* fragment of approximately 8.7 kb containing *CoCCC2* in the wild-type is predicted to be replaced by a fragment of approximately 6.5 kb containing the *hph* fragment. *CoCCC2* gene disruption was confirmed by Southern blot analysis. Genomic DNAs from the wild-type 104-T and transformants were digested with *BamHI* and probed with a downstream 1.0 kb fragment of the *CoCCC2* gene. (C) A schematic diagram of the *MoICT1* gene disruption construct in *M. oryzae* by *Agrobacterium tumefaciens*-mediated transformation with the *moict1* disruption vector to replace a hygromycin phosphotransferase gene (*hph*) fragment with the *MoICT1* gene. Bars represent probes for the DNA gel blot. Following double-crossover homologous recombination, a *BamHI* fragment of approximately 4.3 kb containing *MoICT1* in the wild-type is predicted to be replaced by a fragment of approximately 5.4 kb containing the *hph* fragment. *MoICT1* gene disruption was confirmed by Southern blot analysis. Genomic DNAs from the wild-type 104-T and transformants were digested with *BamHI* and probed with an upstream 1.0 kb fragment of the *MoICT1* gene. (D) A schematic diagram of the *MoCCC2* gene disruption construct in *M. oryzae* by *Agrobacterium tumefaciens*-mediated transformation with the *moccc2* disruption vector to replace a hygromycin phosphotransferase gene (*hph*) fragment with the *MoCCC2* gene. Bars represent probes for the DNA gel blot. Following double-crossover homologous recombination, a *BamHI* fragment of approximately 1.6 kb containing *MoCCC2* in the wild-type is predicted to be replaced by a fragment of approximately 6.7 kb containing the *hph* fragment. *MoCCC2* gene disruption was confirmed by Southern blot analysis. Genomic DNAs from the wild-type 104-T and transformants were digested with *BamHI* and probed with an upstream 1.0 kb fragment of the *MoCCC2* gene.

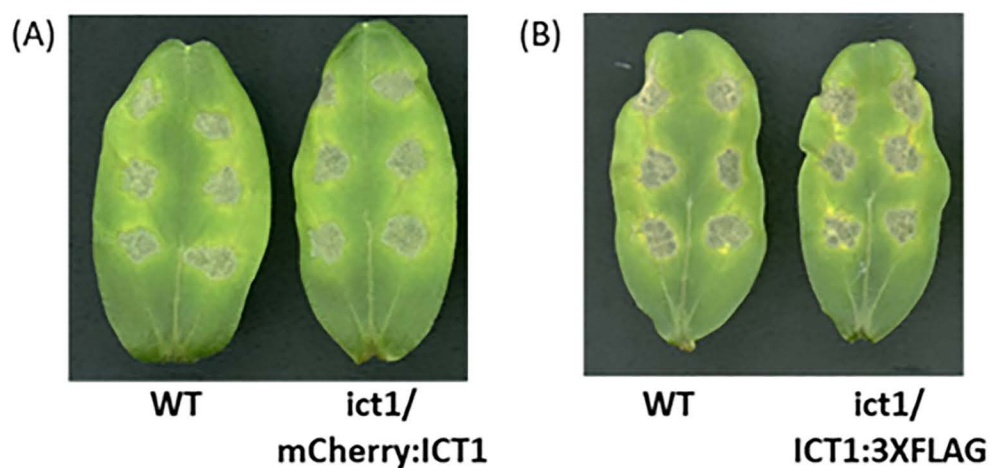

**Figure S5. Pathogenicity Assays on mCherry:ICT1-Introduced Transformant and ICT1:3XFLAG-Introduced Transformant. Related to Figure 2 and 3**

**(A-B)** Inoculation assays of the mCherry:ICT1-introduced transformant and ICT1:3XFLAG-introduced transformant on the intact leaves. Conidial suspensions ( $5.0 \times 10^5$  conidia/ml) of each strain were inoculated with the cucumber cotyledons and inoculated leaves were incubated for 6 days at 24°C. WT, wild-type; *ict1/mCherry:ICT1*, *ict1* mutant expressing the *mCherry:ICT1* fusion gene; *ict1/ICT1:3XFLAG*, *ict1* mutant expressing the *ICT1:3XFLAG* fusion gene.

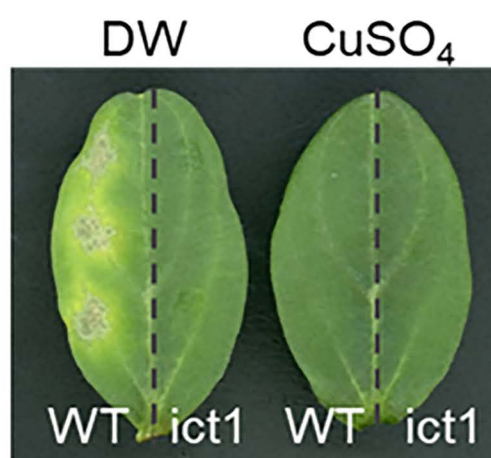

**Figure S6. Pathogenicity Assays on CuSO<sub>4</sub>-treated wild-type and *coict1* mutant. Related to Figure 2**

Inoculation assays of CuSO<sub>4</sub>-treated wild-type and *coict1* mutant on the intact leaves. Ten  $\mu\text{M}$  CuSO<sub>4</sub>-treated conidial suspensions ( $5.0 \times 10^5$  conidia/ml) of each strain were inoculated with the cucumber cotyledons and inoculated leaves were incubated for 6 days at 24°C. WT, wild-type; ict1, *ict1* mutant.

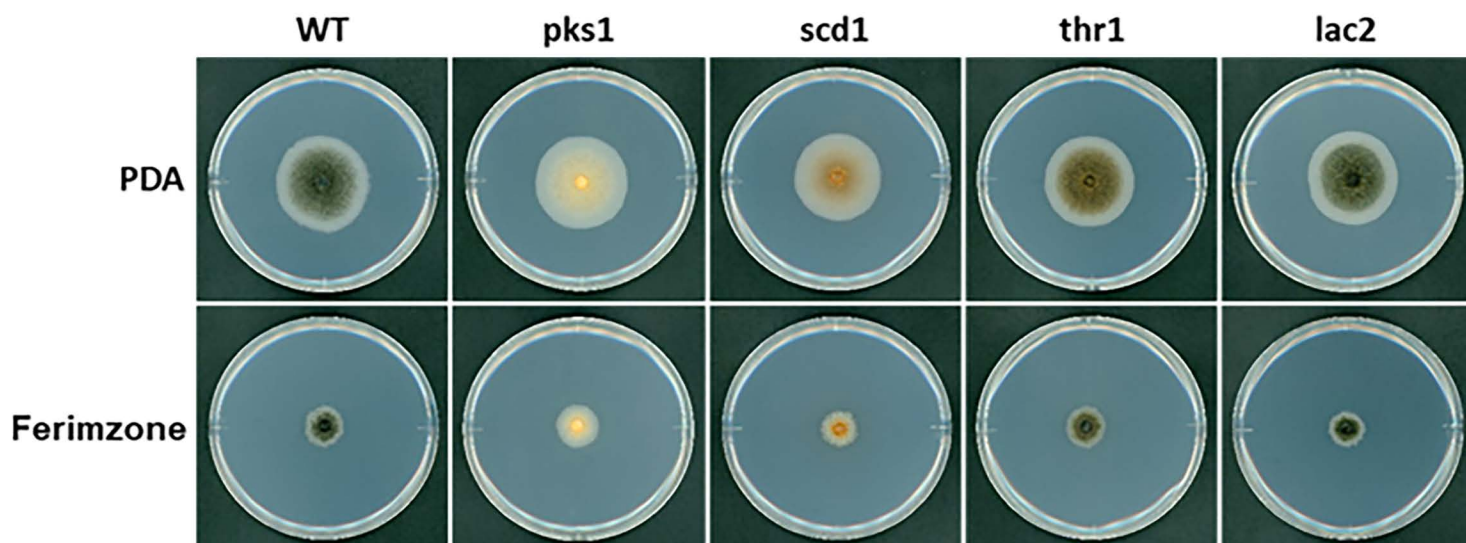

(B)

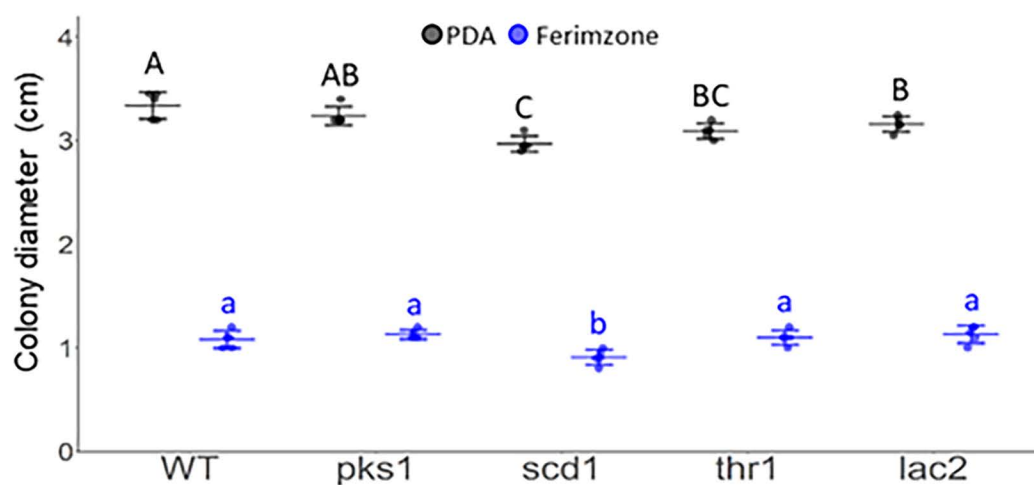

**Figure S7. Ferimzone-Sensitivity Tests in Mutants of Melanin Biosynthesis Genes. Related to Figure 2**

(A) The Colony in the melanin-deficient mutants on the ferimzone-supplemented PDA medium. Mycelia block of each strain was placed on ferimzone-supplemented PDA medium and was incubated for 6 days. WT; wild-type, *pks1*; *copks1* mutant, *scd1*; *coscd1* mutant, *thr1*; *cothr1* mutant, *lac2*; *colac2* mutant.

(B) Average of colony size in the melanin-deficient mutants on the ferimzone-supplemented PDA medium. Error bars represent standard deviation of the mean (n = 5). Different letters above scatter plots of each column represent significant differences (Tukey's HSD test; P < 0.01).



**Table S1. PCR Primers Used in This Study. Related to Figure 1-6**

| Primer name          | Sequence (5'→3')                     | Subject                                      |
|----------------------|--------------------------------------|----------------------------------------------|
| CoICT1F1B            | TCCCTTAATTCTCCGCTACAGCCTCAACCCCAAC   | <i>CoICT1</i> gene complementation construct |
| CoICT1R1A            | CAATCTGATCATGAGTAGATGCGCCTGCTCCTATT  |                                              |
| pBIG4MRBSF1A         | CTCATGATCAGATTGTCGTTTCCCGCCTCAGTTT   |                                              |
| pBIG4MRBSR1B         | CGGAGAATTAAGGGAGTCACGTTATGACCTCTAGT  |                                              |
| HPHF1B               | TGATATTGAAGGAGCATTTTTTGGGCTTGGCTGGA  | <i>coict1</i> gene replacement construct     |
| HPHR1A               | TGGTCCCGGTGCGCATCTACTCTATTCCTTTGCC   |                                              |
| pBlcoict1F1A         | GCCGACCGGGAACCAGGTCTTGCGAGGAGTTTTTG  |                                              |
| pBlcoict1R1B         | GCTCCTCAATATCAACGAGGGAGTGTCTGTGCG    |                                              |
| glymCherryF1A        | GGTGGTGGTGGTGGTATGGTGAGCAAGGGCGAGGA  | <i>CoICT1-mCherry</i> fusion gene construct  |
| mCherryR1B           | TTAAGATCTGTACAGCTCGTCCATGCCGCCGGTGG  |                                              |
| pBICoICT1mCF1A       | CTGTACAGATCTTAAAAGCAGGACGTGATTGATTT  |                                              |
| pBICoICT1mCR1B       | ACCACCACCACCACCTGCGTCGTTGACGTCGACGC  |                                              |
| CoICT1M12AF1B        | GCGAGCTGCGGGCGGCTGCTCCGGCGCCGTCGATCG | <i>CoICT1M12A</i> alanin scanning construct  |
| CoICT1AlaR1A         | AATCACGTCTGCTTCTATGCGTCGTTGACGTCGA   |                                              |
| pBICoICT1AlaF1A      | AAGCAGGACGTGATTGATTTCTTCTGAAACGGGG   |                                              |
| pBICoICT1M12AR1B     | GCCGCCGCAGCTCGCGCTGACGTTGAACTTGTAGG  |                                              |
| CoICT1S13AF1B        | ATGGCCTGCGGGCGGCTGCTCCGGCGCCGTCGATCG | <i>CoICT1S13A</i> alanin scanning construct  |
| CoICT1AlaR1A         | AATCACGTCTGCTTCTATGCGTCGTTGACGTCGA   |                                              |
| pBICoICT1AlaF1A      | AAGCAGGACGTGATTGATTTCTTCTGAAACGGGG   |                                              |
| pBICoICT1S13AR1B     | GCCGCCGCAGGCCATGCTGACGTTGAACTTGTAGG  |                                              |
| CoICT1C14AF1B        | ATGAGCGCCGGCGGCTGCTCCGGCGCCGTCGATCG  | <i>CoICT1C14A</i> alanin scanning construct  |
| CoICT1AlaR1A         | AATCACGTCTGCTTCTATGCGTCGTTGACGTCGA   |                                              |
| pBICoICT1AlaF1A      | AAGCAGGACGTGATTGATTTCTTCTGAAACGGGG   |                                              |
| pBICoICT1C14AR1B     | GCCGCCGGCGCTCATGCTGACGTTGAACTTGTAGG  |                                              |
| CoICT1C17AF2B        | GCCTCCGGCGCCGTCGATCGCGTCCTCAAGAAGCT  | <i>CoICT1C17A</i> alanin scanning construct  |
| CoICT1AlaR1A         | AATCACGTCTGCTTCTATGCGTCGTTGACGTCGA   |                                              |
| pBICoICT1AlaF1A      | AAGCAGGACGTGATTGATTTCTTCTGAAACGGGG   |                                              |
| pBICoICT1C17AR2B     | GACGGCGCCGAGGCGCCGCCGAGCTCATGCTGA    |                                              |
| CoICT1FLAGF1A        | TCCACCCCAACAACAGGCGTCAAGTCTTACGAAGT  | <i>CoICT1-3XFLAG</i> construct               |
| CoICT1FLAGR1B        | ACCCGCACCGCAGCCCGCTCGTTTCAAGGGTTATC  |                                              |
| pBISCOICT1glyFLAGF1B | GGCTGCGGTGCGGGTGTGAATGTGCTTGTGGGT    |                                              |
| pBISCOICT1glyFLAGR1A | TGTTGTTGGGGTGGAAAAGGATGTCAGCGCACAG   |                                              |
| CoCCC2F1B            | TCCCTTAATTCTCCGATCAACAGGCCGATAAGGTG  | <i>CoCCC2</i> gene complementation construct |

|                |                                      |                                              |
|----------------|--------------------------------------|----------------------------------------------|
| CoCCC2R1A      | CAATCTGATCATGAGACGACATGATCACGCTTCTG  |                                              |
| pBIG4MRBSF1A   | CTCATGATCAGATTGTCGTTTCCCGCCTTCAGTTT  |                                              |
| pBIG4MRBSR1B   | CGGAGAATTAAGGGAGTCACGTTATGACCTCTAGT  |                                              |
| HPHF1B         | TGATATTGAAGGAGCATTMTTGGGCTTGGCTGGA   |                                              |
| HPHR1A         | TGGTCCCGGTCGGCATCTACTCTATTCCTTTGCC   | <i>coccc2</i> gene replacement construct     |
| pBlcoccc2F1A   | GCCGACCGGGAACCAATTCATGGAATCAGTATTCC  |                                              |
| pBlcoccc2R1B   | GCTCCTTCAATATCATTGCCGCGTATACGGCTGAG  |                                              |
| CCC23HAF1A     | ACGCGCCCGAGTTACATGACTGACCCGTCGACGCA  |                                              |
| CCC23HAR1B     | CGAAACCACAACAAGCTTGCAAGATGGGCTGATAA  | <i>CoCCC2-3XHA</i> construct                 |
| pBISCCC23HAF1B | CTTGTTGTGGTTTCGCCTAGCATAGCATCGGAGTC  |                                              |
| pBISCCC23HAR1A | GTAACCTCGGGCGCGTCCAGAACTTCAGCAGCAAAC |                                              |
| MoICT1F1B      | TCCCTTAATTCTCCGCCTTGTGAACCATGGGCTAT  |                                              |
| MoICT1R1A      | CAATCTGATCATGAGTTTTGACTCCTTTCGGGTTG  | <i>MoICT1</i> gene complementation construct |
| pBIG4MRBSF1A   | CTCATGATCAGATTGTCGTTTCCCGCCTTCAGTTT  |                                              |
| pBIG4MRBSR1B   | CGGAGAATTAAGGGAGTCACGTTATGACCTCTAGT  |                                              |
| HPHF1B         | TGATATTGAAGGAGCATTMTTGGGCTTGGCTGGA   |                                              |
| HPHR1A         | TGGTCCCGGTCGGCATCTACTCTATTCCTTTGCC   | <i>moict1</i> gene replacement construct     |
| pBlmoictF1A    | GCCGACCGGGAACCAAAAACCCCGCTTTTGGGTCCG |                                              |
| pBlmoictR1B    | GCTCCTTCAATATCATTGATTGTTTGAATGGG     |                                              |
| MoCCC2F1B      | TCCCTTAATTCTCCGATTTCCGAAGTTTGGTTGCT  |                                              |
| MoCCC2R1A      | CAATCTGATCATGAGGAAGTTGCCCTGCCAAAAG   | <i>MoCCC2</i> gene complementation construct |
| pBIG4MRBSF1A   | CTCATGATCAGATTGTCGTTTCCCGCCTTCAGTTT  |                                              |
| pBIG4MRBSR1B   | CGGAGAATTAAGGGAGTCACGTTATGACCTCTAGT  |                                              |
| HPHF1B         | TGATATTGAAGGAGCATTMTTGGGCTTGGCTGGA   |                                              |
| HPHR1A         | TGGTCCCGGTCGGCATCTACTCTATTCCTTTGCC   | <i>moccc2</i> gene replacement construct     |
| pBlmoccc2F1A   | GCCGACCGGGAACCACATGGACTGAGGTGCACCGG  |                                              |
| pBlmoccc2R1B   | GCTCCTTCAATATCACCGTGGTCAAATGGGGCGAC  |                                              |

# 1 **Transparent Methods**

## 2 **Fungal strains and fungal transformation**

3 The *Colletotrichum orbiculare* strain 104-T and *Magnaporthe oryzae* strain P2 were used as the wild-  
4 types. All *C. orbiculare* and *M. oryzae* strains were cultured on PDA media (3.9% [w/v] PDA; Nissui  
5 Pharma) at 24 °C. For induction of conidia formation, *M. oryzae* strains were cultured on OTA media  
6 (7.25% [w/v] OTA; Difco Laboratories) under blue black light irradiation at 24 °C. *Agrobacterium*  
7 *tumefaciens*-mediated transformation (AtMT) and confirmation of targeted gene disruption by southern  
8 blot analysis were done as previously described (Tsuji et al., 2003; Harata and Kubo, 2014).

9

## 10 **Screening of low sensitivity to ferimzone and identification of mutated genes**

11 For screening of ferimzone-tolerant mutants, T-DNA insertional transformants generated by AtMT  
12 were incubated on PDA containing 10 µg/ml of ferimzone. After incubation for five days at 24 °C, we  
13 selected transformants that showed greater hyphal growth on ferimzone-containing media than the wild-  
14 type. Genomic DNA fragments flanking the inserted T-DNA in selected mutants were amplified by  
15 thermal asymmetrical interlaced PCR (Tail PCR) with specific primers and sequenced (Tsuji et al., 2003).

16

## 17 **Plasmid construction for targeted gene disruption**

18 All cloning for plasmid construction was carried out using an In-Fusion HD Cloning Kit (Clontech).

19 All primers used in this study are listed in Table S1. (Table S1. PCR Primers Used in This Study, Related  
20 to Figure 1-6).

21 For the construction of the *CoICT1* gene complementation plasmid (pBIG4MRSCoICT1), an  
22 approximately 4.2 kb *CoICT1* fragment and pBIG4MRSrev vector fragment, including the sulfonyleurea-  
23 resistance gene, were amplified by PCR with appropriate primer pairs, respectively. pBIG4MRSCoICT1  
24 was generated by insertion of the amplified *CoICT1* fragment into the linearized pBIG4MRSrev vector.  
25 *CoCCC2*, *MoICT1* and *MoCCC2* gene complementation plasmids were generated by the procedure  
26 described above.

27 For the construction of the *coict1* gene replacement plasmid (pBIG4MRScoict1), an approximately  
28 1.4 kb hygromycin-resistance gene fragment (HPH) and a pBIG4MRSCoICT1 vector fragment not  
29 including the *CoICT1* ORF region were amplified by appropriate primer pairs, respectively.  
30 pBIG4MRScoict1 was generated by insertion of HPH into the linearized pBIG4MRSCoICT1 vector. The  
31 *coccc2*, *moict1* and *moccc2* gene replacement plasmids were generated by the procedure described above.

32 For the construction of the *CoICT1-mCherry* fusion gene, the *mCherry* fluorescent gene fragment  
33 and a pBIG4MRSCoICT1 vector fragment were amplified by PCR using appropriate primer pairs,  
34 respectively. pBIG4MRSCoICT1mC was generated by inserting the *mCherry* gene into the linearized  
35 pBIG4MRSCoICT1 vector.

36 For the construction of the plasmids used for alanine substitutions in the metal-binding site of *CoICT1*,

37 an approximately 0.4kb *CoICT1* fragment with designed mutations and the pBIG4MRSCoICT1 vector  
38 fragment not including the *CoICT1* ORF region (33-475 nt) were amplified by appropriate primer pairs,  
39 respectively.

40

#### 41 **Microscopic observation**

42 For observation of infection-related morphogenesis, 20  $\mu$ l conidial suspensions ( $1.0 \times 10^5$  or  $5.0 \times 10^5$   
43 conidia/ml) with distilled water were placed on eight spots per cover slip and incubated for 24 h at 24°C.

44 For the observation of hyphal growth, 50  $\mu$ l conidial suspensions ( $2.5 \times 10^4$  conidia/ml) with 0.1% yeast  
45 extract or liquid PSY medium were placed on cover glasses and incubated at 28°C for 48 h or 72 h. The  
46 conidial germination, appressoria formation and hyphal growth of each strain were observed using an  
47 Olympus BX53 microscope. Melanin pigmentation of appressoria were measured by gray scale value in  
48 ImageJ.

49 mCherry fluorescent signals were observed by a Leica SP8 confocal laser scanning microscope  
50 equipped with a diode-pumped solid-state 561 nm laser. Existing mCherry signals were detected from 595  
51 to 630 nm using a SP8 hybrid detector. Images were taken using a 10 $\times$  lens and a 63 $\times$  oil immersion  
52 lens. The intensity of mCherry fluorescent signal in an appressorial cell was measured by imageJ.

53

#### 54 **Western blot analysis**

55 Total protein extraction from vegetative mycelia in PSY media with or without ferimzone and CuSO<sub>4</sub>  
56 was performed as described previously (Harata and Kubo, 2014). Samples were separated by  
57 SuperSep™Ace (Wako) and transferred to polyvinylidene difluoride (PVDF) membranes. Anti-FLAG  
58 M2-peroxidase monoclonal antibody (Sigma-Aldrich) was used as a primary antibody. SuperSignal™  
59 West Pico PLUS Chemiluminescent Substrate (Thermo Fisher) was used as a chemiluminescent substrate  
60 and signals were detected with Amersham Imager 600 imagers (GE Healthcare).

61

#### 62 **Measurement of intracellular Cu contents**

63 Vegetative hyphae incubated for 42 h in liquid PSY media were treated with CuSO<sub>4</sub>, ferimzone, or  
64 both by additional incubation for six h. After a total incubation of 48 h, mycelia were collected, washed  
65 two times with 100 μM EDTA and immediately frozen using liquid nitrogen. Freeze-dried mycelial tissues  
66 (100 mg) were digested in 60% HNO<sub>3</sub> at 90 °C for 140 min and H<sub>2</sub>O<sub>2</sub> using DigiPREP Jr (GL SCIENCE).  
67 The Cu content of samples was measured using an iCAP 7400 Duo system (Thermo Scientific).

68

#### 69 **Pathogenicity assays**

70 Droplet inoculations onto detached cucumber cotyledons (*Cucumis sativus* L. suyo) were performed  
71 using *C. orbiculare* conidia suspended with distilled water. Spray inoculations and block inoculations onto  
72 detached barley leaves (Nigrate) were performed using *M. oryzae* conidia suspended with 0.01% Tween

73 20 solution and mycelial blocks, respectively. Inoculated leaves were incubated in a humid box at 24°C  
74 with a 16 h photoperiod for six days.

75

## 76 **Statistical Analysis**

77 Error bars of the graphs represent the mean value  $\pm$  standard deviation (SD). To compare two different  
78 groups, Student's t-test was used as the parametric test and Mann-Whitney U test was used as the non-  
79 parametric test. To compare two same groups, Wilcoxon signed-rank test was used as the non-parametric  
80 test. To compare multi groups, one-way analysis of variance (ANOVA) with Turkey's HSD post-hoc test  
81 was used as the parametric test and Kruskal-Wallis Test with Steel-Dwass post-hoc test as the  
82 nonparametric test. Statistical analysis was performed using Microsoft Excel 2019 and R package.

83

## 84 **Accession Numbers**

85 GenBank accessions: CoIct1 (TDZ25172), CoCcc2 (TDZ20317), MoIct1 (EHA56579), MoCcc2  
86 (EHA49837), *Aspergillus fumigatus* Atx1 (EAL90217), *Saccharomyces cerevisiae* Atx1 (DAA10300),  
87 *Saccharomyces cerevisiae* Ccc2 (DAA12113).

88

## 89 **References**

90 Tsuji, G., Fujii, S., Fujihara, N., Hirose, C., Tsuge, S., Shiraishi, T. (2003). *Agrobacterium tumefaciens-*

91 mediated transformation for random insertional mutagenesis in *Colletotrichum lagenarium*. J Gen Plant  
92 Pathol. 69: 230-239.

93 Harata, K., and Kubo, Y. (2014). Ras GTPase activating protein CoIra1 is involved in infection-related  
94 morphogenesis by regulating cAMP and MAPK signaling pathways through CoRas2 in *Colletotrichum*  
95 *orbiculare*. PLoS One. 9: e109045.
